# Supplementary material for: Bifunctional M13 Phage as Enzyme Container for the Reinforced Colorimetric–Photothermal Dual-Modal Sensing of Ochratoxin A
Source: MDPI journal article supplement (doi:10.3390/toxins15010005), 2022-12-20
Supplement: s1 [file s1]

## Article

# Bifunctional M13 Phage as Enzyme Container for The Reinforced Colorimetric–Photothermal Dual-Modal Sensing of Ochratoxin A

Hanpeng Xiong, Weipeng Tong, Hao Fang, Yuhao Wu, Haichuan Li, Xiaolin Huang, Yuankui Leng and Yonghua Xiong

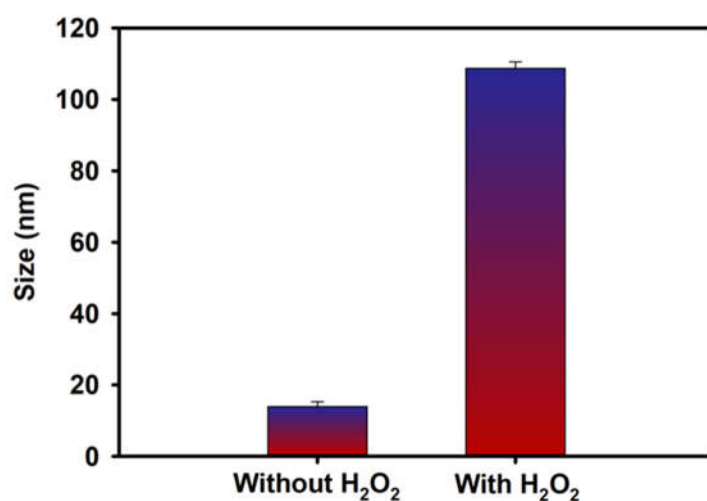

**Figure S1.** The particle size of AuNPs aggregation induced by HRP-H<sub>2</sub>O<sub>2</sub>-Tyramine system and dispersion of AuNPs in the absence of H<sub>2</sub>O<sub>2</sub>.

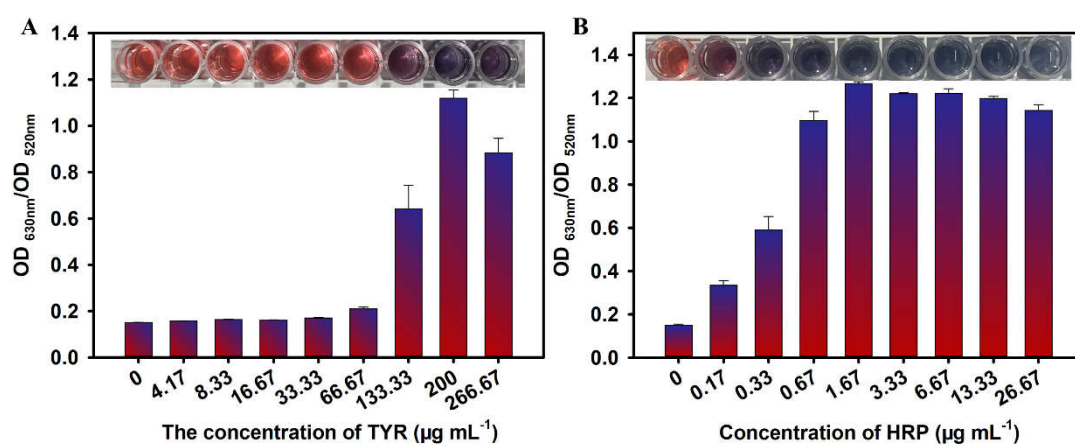

**Figure S2.** Optimization of the substrate solution of HRP-Tyramine-AuNPs signal transduction. (A) tyramine and (B) HRP.

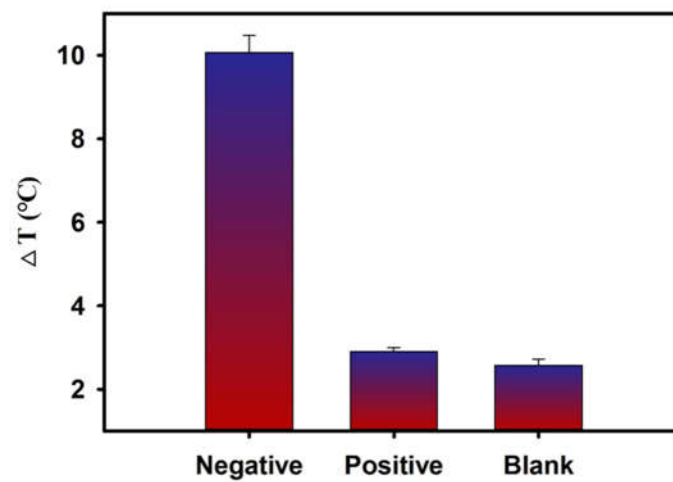

**Figure S3.** Feasibility to adopt the biotinylated M13<sub>OTA</sub> phage as competing antigen in the proposed dc-ppELISA for OTA detection. The blank group was conducted in the absence of biotinylated M13<sub>OTA</sub>, the negative and positive groups were conducted with OTA negative and OTA positive (1 ng mL<sup>-1</sup>) samples in the presence of biotinylated M13<sub>OTA</sub>. The error bars represent the standard deviation of the three measurements.

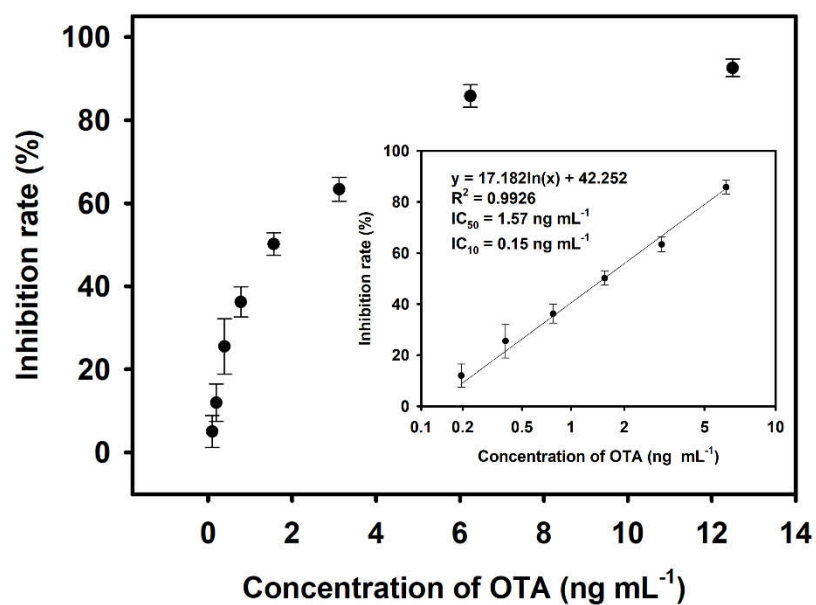

**Figure S4.** Calibration curve of conventional HRP-based ELISA, the inset shows a dynamic linear range of OTA concentrations from 0.098 ng mL<sup>-1</sup> to 3.125 ng mL<sup>-1</sup>. Each independent experiment was repeated 3 times.

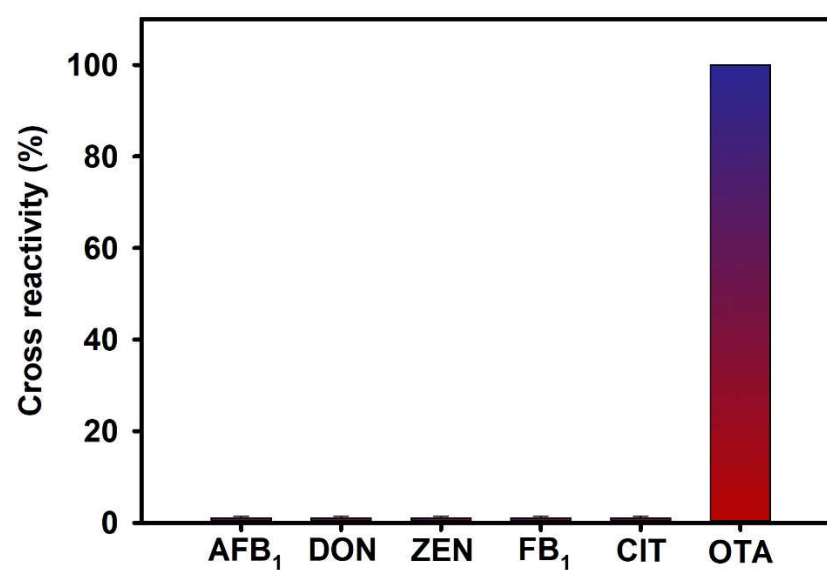

**Figure S5.** Cross-reactivity of the proposed dc-ppELISA toward other common mycotoxins. The samples detected are AFB<sub>1</sub>, DON, ZEN, FB<sub>1</sub>, CIT, and OTA. Error bars represent the standard deviation based on three measurements.

**Table S1.** Optimization of the working conditions of coating antibody and biotinylated M13<sub>OTA</sub> phage using checkerboard method.

| Concentration of<br>anti-OTA ascitic<br>fluids ( $\mu\text{g mL}^{-1}$ ) | Concentration of Bio-phage ( $\text{pfu mL}^{-1}$ ) |                 |                 |                 |
|--------------------------------------------------------------------------|-----------------------------------------------------|-----------------|-----------------|-----------------|
|                                                                          | $4 \times 10^9$                                     | $2 \times 10^9$ | $1 \times 10^9$ | $5 \times 10^8$ |
| 3.00                                                                     | 52.52                                               | 54.07           | 65.48           | 70.66           |
| 1.50                                                                     | 79.17                                               | 75.00           | 65.74           | 66.59           |
| 0.75                                                                     | 75.20                                               | 82.41           | 76.54           | 38.58           |
| 0.38                                                                     | 75.60                                               | 67.43           | 45.05           | 68.02           |
